# Supplementary material
Source: publisher figshare collection journal article supplement (https://tandf.figshare.com/ndownloader/files/18714980)
Supplement: Supplementary file 1 [file 18714980]

xread
46 32
Acorus	1000001001000300000111000001000010200000000000
Alloschemone	0?000010000000100000000000000001131?00?11020?0
Ambrosina	0?100010000031000000000000000411012010000021?[0 2]
Amorphophallus	0?1000[0 1]00010400000000000000003111300[0 1]001[0 2]031?1
Anadendrum	0?000000000030000000000000000000130000000030?3
Aquaephyllum_au	?????????001300101011000??????????????????????
Arisaema	0?1000100010400000000000000003111120[0 1]1[0 1][0 1][0 2]12111
Arisarum	0?100000000011000000000000000311032010?03031?[0 2]
Arophyton	0?100000000011000000000000000111132011?12231?1
Callopsis	0?100010000011000000000000000111130010012231?1
Carlephyton	0?1000000000110000000000000001101320[0 1]1?00231?1
Cobbania_corru	11100?0?0001200010110001000???????????????????
Cobbania_hicke	11100?0?0001200010100001000???????????????????
Colocasia	[0 1]010000000001[1 2]000000000000000411012001012[0 1]21?[1 2]
Cyrtosperma	10100010100011000000000000000000[0 1]1000000000010
Gorgonidium	0?1000100000100000000000000001111320[0 1][0 1]?12031?0
Gymnostachys	0?00001001000201000111000000000011200000000010
Lemna	11?21101?1003?000001110201101?1111[0 1 2]11000111001
Limnobiophyllu	1110010?01002[0 1]001001000100??1?1?????100??110[0 1]1
Peltandra	10100010000011000000000000000411132001112[0 2]31?1
Philodendron	0?10001000[0 1]0[1 3 4][0 1][0 1]00000000000000211[0 1]0[0 2]0[0 1]0012021?3
Pistia	1110001000003000100100010010141101211100202112
Pothos	0?00001000003[0 1]00000000000000000013000[0 1]?00000?0
Protarum	0?1000100010400000000000000004111320[0 1]1?12031?2
Schismatoglott	[0 1]2[0 1]000100000[1 3][0 1]0000000?0100000411[0 1]2001[0 1]?12031?3
Spathicarpa	0?1000100000[1 3]1100[0 1]000000000001111320[0 1]1?12031?3
Spirodela	11?11101?1002?000001110201101?1111[0 2]11000111001
Wolffia	11?21102?1003?000001111211?11?1111211010111001
Wolffiella	11?21102?1003?000001111211?11?1111211010111001
Zomicarpa	0?10000000001110000[0 1]000000000311030010?12230?1
Zomicarpella	0?10000000001100000[0 1]000000000311[0 1]30010012230?1
Ncrenae	11?1????00?13001?00110?000????????????????????
;


proc /;
comments 0
;
